# Supplementary material for: Dynamic hydrogen bubbling templated AgSn@SnOx electrocatalyst for selective electrochemical CO2 reduction: adjusting the binding energy of the HCOO* intermediate
Source: Royal Society of Chemistry journal article supplement (doi:10.1039/d3cy00939d), 2023-01-01
Supplement: d3cy00939d1.pdf [file d3cy00939d1.pdf]

## Supporting Information

### **Dynamic hydrogen bubbling templated AgSn@SnO<sub>x</sub> electrocatalyst for selective electrochemical CO<sub>2</sub> reduction: Adjusting the binding energy of the HCOO<sup>\*</sup> intermediate**

Hisham G. Elaqapa<sup>a</sup>, Ibrahim M. Badawy<sup>a</sup>, Ghada E. Khedr<sup>a,b</sup>, Ahmed M. Agour<sup>a</sup>, Doha M. Sayed<sup>a,c</sup>, Manar M. Taha<sup>a</sup>, Nageh K. Allam<sup>a\*</sup>.

<sup>a</sup>Energy Materials Laboratory (EML), School of Sciences and Engineering, The American University in Cairo, New Cairo 11835, Egypt.

<sup>b</sup>Department of Analysis and Evaluation, Egyptian Petroleum Research Institute, Cairo, 11727, Egypt.

<sup>c</sup>Department of Chemistry, Faculty of Science, Cairo University, Cairo 12613, Egypt.

\* Corresponding Author's email: [nageh.allam@aucegypt.edu](mailto:nageh.allam@aucegypt.edu)

## 1. Experimental

### 1.1 Materials

Copper foil (0.25 mm thickness; Alfa Aesar),  $\text{SnCl}_4 \cdot x\text{H}_2\text{O}$  (Alfa Aesar, ( $\geq 99.0\%$ )),  $\text{AgNO}_3$  (Sigma Aldrich, ( $\geq 99.0\%$ )),  $\text{H}_2\text{SO}_4$  (Sigma Aldrich, ( $\geq 99.0\%$ )). All high grade without further Purification. Milli-Q ultrapure water was used throughout the preparation of all solutions.

### 1.2 Synthesis of $\text{AgSn@SnO}_x$

Dynamic hydrogen bubbling templated electrodeposition was involved as a simple and efficient strategy to synthesize a porous foam dendritic structure of Sn metal from an electroplating solution of 0.15 M of  $\text{SnCl}_4 \cdot x\text{H}_2\text{O}$  dissolved in 1.5 M  $\text{H}_2\text{SO}_4$  on a copper sheet. First, a copper sheet was mechanically polished by a sandpaper, then soaked in a 3 M HCl solution for 5 minutes to remove any native oxide layer. Subsequently, the copper sheet was rinsed in deionized water and ethanol, in order, for five minutes under sonication to remove any traces of HCl. Then, the pre-cleaned copper mesh was masked with polytetrafluoroethylene (PTFE) tape to fix the exposed geometric surface area of the copper sheet to  $1 \text{ cm}^2$ . Afterwards, a three-electrode electrochemical setup was engaged for the galvanostatic deposition process using a counter electrode of graphite rod and  $\text{HgSO}_4$  reference electrode. The galvanostatic deposition was optimized to last for 1 minute under a potential of -2.25 V that was equivalent a current density of  $400\text{--}450 \text{ mA}\cdot\text{cm}^{-2}$  with a  $1 \text{ cm}^2$  defined distance between both the copper sheet and the counter electrode. Finally, the deposited film is dipped into 5 mM solution of  $\text{AgNO}_3$  to implement the galvanic displacement, applying different periods of time (15, 30, 45 s).

### 1.3 Electrochemical measurements

The electrocatalytic assessments for  $\text{CO}_2$  reduction were conducted using an H-cell design inspired by Dr. Kuhl. The H-cell comprises two acrylic plates, each with a working area of  $8 \times 8 \text{ mm}$  for placing the anode and cathode materials. A Nafion 117 membrane is placed between the two plates, and a reference electrode is inserted through a hole in the cathode compartment.  $\text{CO}_2$  gas with a purity of 99.999% is introduced into the H-cell from the bottom at a controlled flow rate of 15 standard cubic centimeter per minute (sccm) using a mass flow controller (MFC). The product gas is directed towards the inlet valve of the gas chromatography (GC), where it is analyzed at set intervals of 13 minutes, 32 minutes, and 55 minutes with a total runtime of 60

minutes for each run. A Biologic SP300 type potentiostat/galvanostat was used for all electrochemical experiments with a 3-electrode set-up in the acrylic cell. The three electrode-system involved a counter electrode of platinized titanium mesh, and Ag/AgCl (KCl sat.) as a reference electrode. All potential values were converted to the reversible hydrogen electrode (RHE) scale by the given formula:  $E_{\text{RHE}} = E_{\text{Ag/AgCl}} + 0.210 \text{ V} + 0.059 \text{ pH}$ . The iR drop was compensated using 85% of the measured  $R_u$ . All current densities were normalized to the geometric area of the working electrode ( $1 \text{ cm}^2$ ). The protocol employed for measuring  $\text{CO}_2\text{RR}$  performance involves several steps:

- 85% iR compensation is applied, followed by a 30-minute period of open circuit potential (OCP).
- Prior to electrolysis, the electrolyte in each compartment is purged with  $\text{CO}_2$  gas for 30 minutes.
- Chronoamperometric measurements are then taken at various operating potentials and the gaseous products are measured every 15 minutes over a one-hour period of electrolysis. The liquid product is vialled and measured after the experiment.

#### 1.4 Product analysis

Gas phase products were measured using a gas chromatography (SRI 8610C Multi-gas #5, 6' Haysep D and 6' Molecular Sieve 5A) during the experiments. The gas chromatography was fitted with a thermal couple detector (TCD) and a flame ionization detector (FID), with Argon (99.9999%) used as the carrier gas. The system comprised of gas-lines that were directly connected to the acrylic cell and led out to the gas chromatography. The high performance liquid chromatography (HPLC) method using Eclipse XBD-C18 and acidified deionized water as the mobile phase with a flow rate of  $0.6 \text{ mL/min}$  was utilized to measure the liquid phase products. The calculation of the FE of gaseous and liquid products was done by the following equation:

$$FE = \frac{zFn}{it} \quad (1)$$

Where (z) is the number of electrons transferred to produce one mole of product (i.e.,  $z = 2$  for all products generated in this work), (F) is the faraday constant of  $96485 \text{ C.mol}^{-1}$ , (n) is the number

of moles of products; quantified by GC and HPLC, (I) is the current density in Ampere (A), and (t) is the reaction time in seconds.

## 2. Materials characterization

Powder XRD analysis was implemented via a D8 Discover(Bruker). The samples morphology were investigated by scanning electron microscope (SEM, Model JSM-760F). Energy-dispersive X-ray spectrometer (EDS) mapping was conducted using JEM-ARM 200F. TEM imaging and selected area electron diffraction (SAED) studies were carried out using Talos-F200i TEM. The elemental composition of the surface and the valence states of the samples were analyzed through X-ray photoelectron spectroscopy (XPS) with Al K $\alpha$  radiation.

## 3. Computational details

Binding energies of the intermediates on SnO (101) and AgSn@SnO were calculated using Vienna Ab initio Simulation Package (VASP) software with Vanderbilt ultrasoft pseudopotentials. A supercell of 3 $\times$ 3 $\times$ 3 was created from SnO and AgSn. (101) surface was cleaved from SnO supercell; the core shell system was designed using VESTA. To prevent interactions with periodic images, a vacuum slab with a thickness of 15 Å was constructed. The calculations employed the generalized gradient approximation (GGA) with the Perdew–Burke–Ernzerhof (PBE) functional. The cut-off energy was set to 500 eV, and a self-consistent field (SCF) tolerance of  $1.0 \times 10^{-8}$  eV was used. The Brillouin zone was sampled using a Monkhorst–Pack k-point grid of 3 $\times$ 3 $\times$ 1. For relaxation, we used conjugate gradient (CG) algorithm. VASPsol software was used to investigate the water-solvent effect on all the intermediates. It is an implicit solvation model which is based on Polarizable Continuum Model (PCM).

The optimization of the free CO<sub>2</sub> molecule was performed within a 10 $\times$ 10 $\times$ 10 Å unit cell. The resulting optimized C-O bond length and O-C-O angle were found to be 1.178 Å and 180.0°, respectively, which align with available experimental and theoretical data. The adsorption energy of CO<sub>2</sub> is calculated using the following equation:

$$E_{\text{ads}} = E_{\text{CO}_2+\text{surface}} - (E_{\text{CO}_2} + E_{\text{surface}})$$

Here,  $E_{\text{CO}_2+\text{surface}}$  represents the energy of the surface with the adsorbed  $\text{CO}_2$ ,  $E_{\text{CO}_2}$  represents the energy of the free  $\text{CO}_2$  molecule, and  $E_{\text{surface}}$  represents the energy of the surface. The Cu site was selected for adsorption. The adsorption energies were calculated relative to  $\text{H}_2(\text{g})$  as:

$$\Delta E = E_{\text{slab+H}} - E_{\text{slab}} - \frac{1}{2}E_{\text{H}_2}$$

The associated free energy of H is given by:

$$\Delta G = \Delta E + \Delta \text{ZPE} - T\Delta S$$

Here,  $\Delta \text{ZPE}$  represents the difference in zero-point energy, and  $\Delta S$  represents the difference in entropy between the adsorbed state and the gas phase. Considering that  $\Delta \text{ZPE} - T\Delta S$  is approximately 0.24 eV, we can calculate  $\Delta G$  as  $\Delta E + 0.24$  eV.

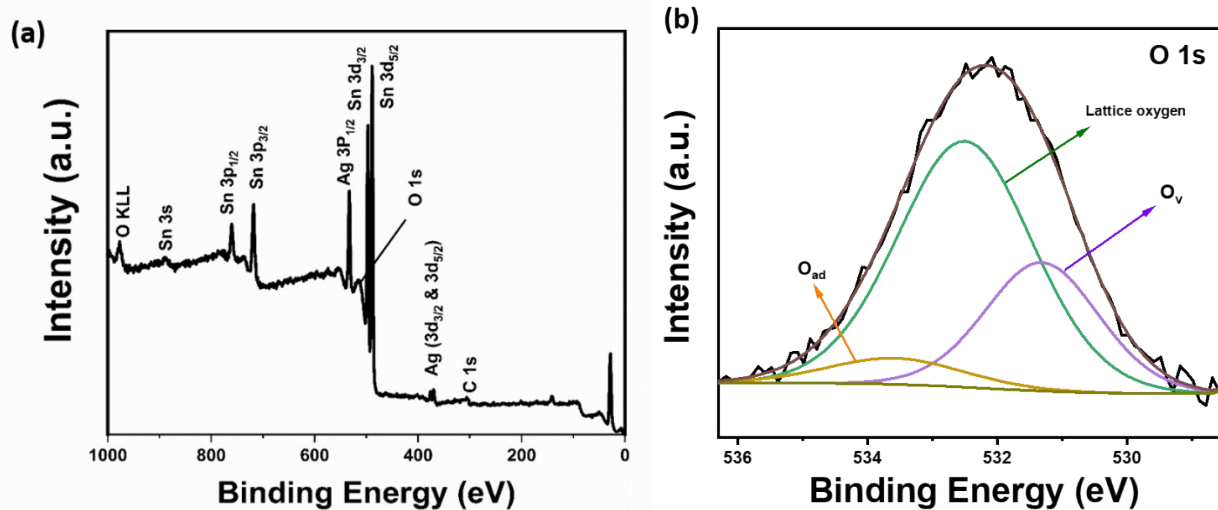

**Figure S1.** (a) Spectrum survey, (b) O1s spectrum of AgSn@SnO<sub>x</sub>(30 sec).

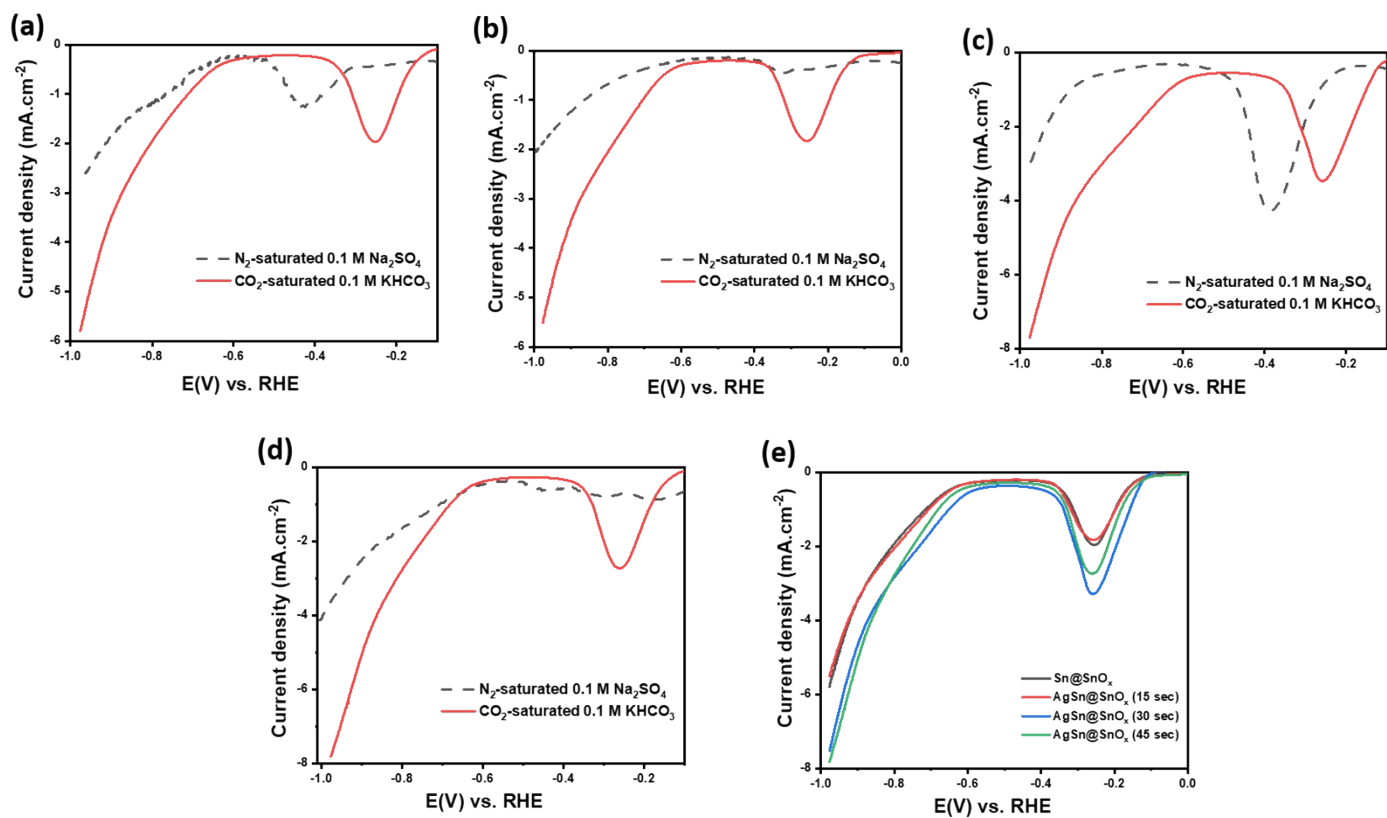

**Figure S2.** Polarization curves of (a) Sn@SnO<sub>x</sub>, (b) AgSn@SnO<sub>x</sub> (15 s), (c) AgSn@SnO<sub>x</sub>(30 s), and (d) AgSn@SnO<sub>x</sub>(45 s) in N<sub>2</sub>-saturated 0.1 M Na<sub>2</sub>SO<sub>4</sub>, and CO<sub>2</sub>-saturated 0.1 M KHCO<sub>3</sub>. Scan rate=10 mV.s<sup>-1</sup>(e) LSV profiles of the different catalysts in CO<sub>2</sub>-saturated 0.1 M KHCO<sub>3</sub>. Scan rate=10 mV.s<sup>-1</sup>

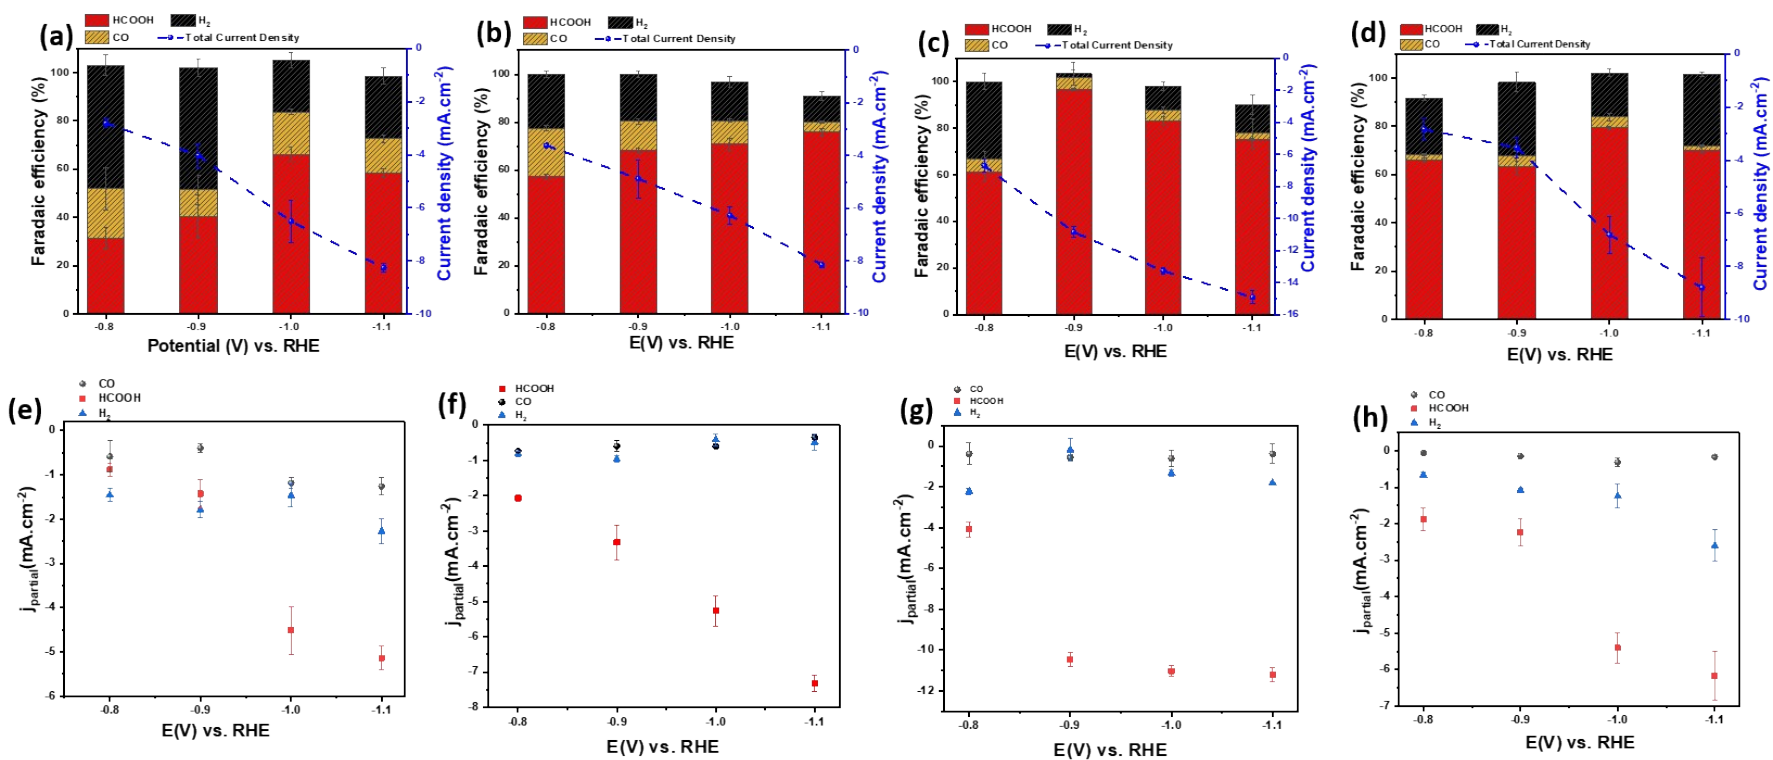

**Figure S3.** Total current densities, faradaic efficiencies of CO, H<sub>2</sub>, and HCOOH, and their corresponding partial current densities at different potentials vs. RHE; (a-e) Sn@SnO<sub>x</sub>, (b-f) AgSn@SnO<sub>x</sub>(15 s), (c-g) AgSn@SnO<sub>x</sub>(30 s), (d-h) AgSn@SnO<sub>x</sub>(45 s). Error bars represent the standard deviation, obtained by studying three different electrodes.

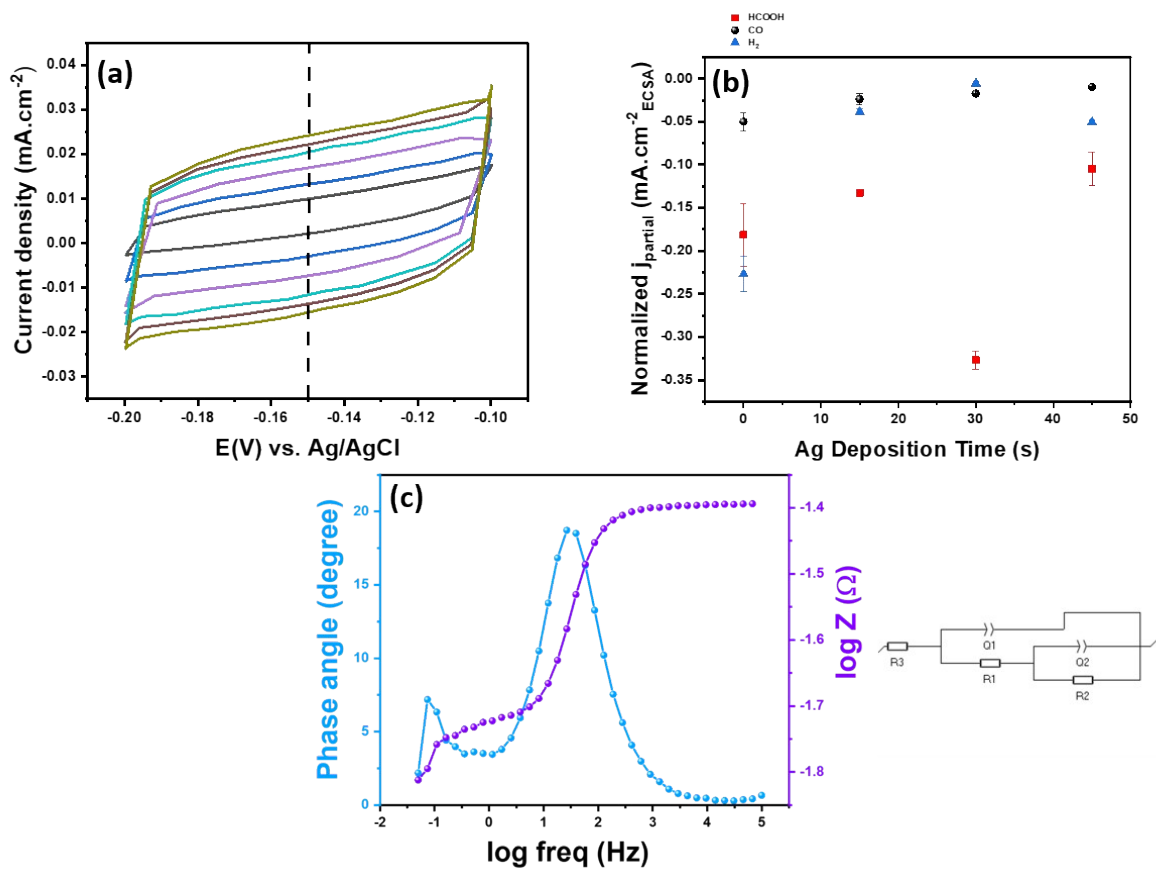

**Figure S4.** (a) CVs at the non-faradaic region between -0.1 and -0.2 V vs. Ag/AgCl (KCl sat.) for AgSn@SnO<sub>x</sub>(30 s) in 0.1 M CO<sub>2</sub>-saturated KHCO<sub>3</sub>. (b) Normalized partial current densities corresponding to HCOOH, CO, H<sub>2</sub> for AgSn@SnO<sub>x</sub>(30 s). (c) Potentioelectrochemical impedance spectroscopy in the Bode plot format and equivalent circuit.



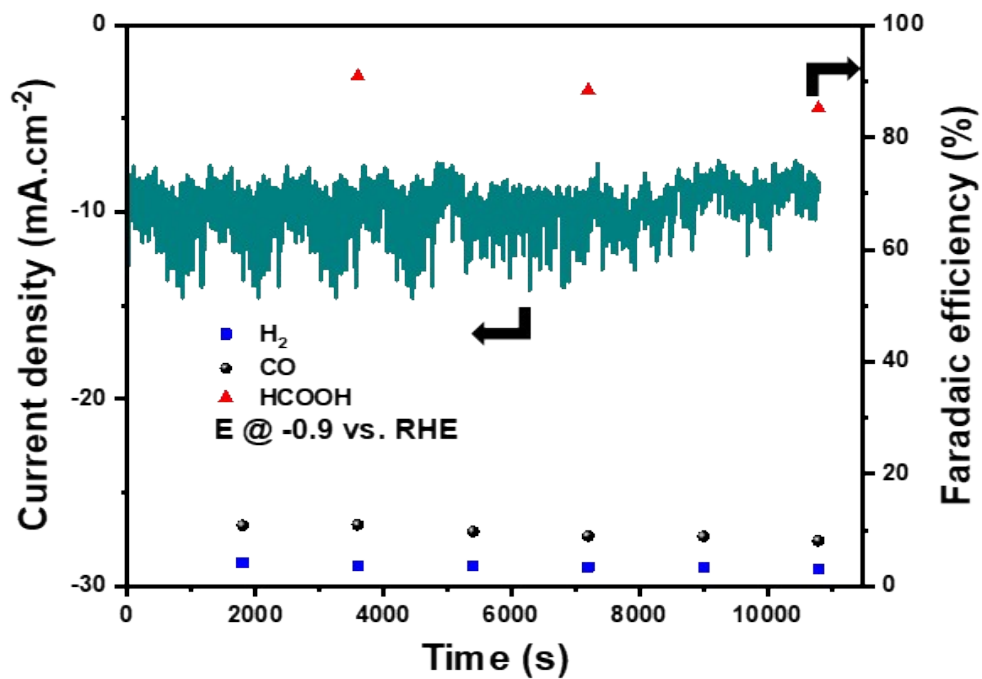

**Figure S5.** Chronoamperometry run and faradaic efficiencies of HCOOH, CO, H<sub>2</sub> demonstrates the stability of AgSn@SnO<sub>x</sub> (30 s) over 3 hours at -0.9 V vs. RHE.

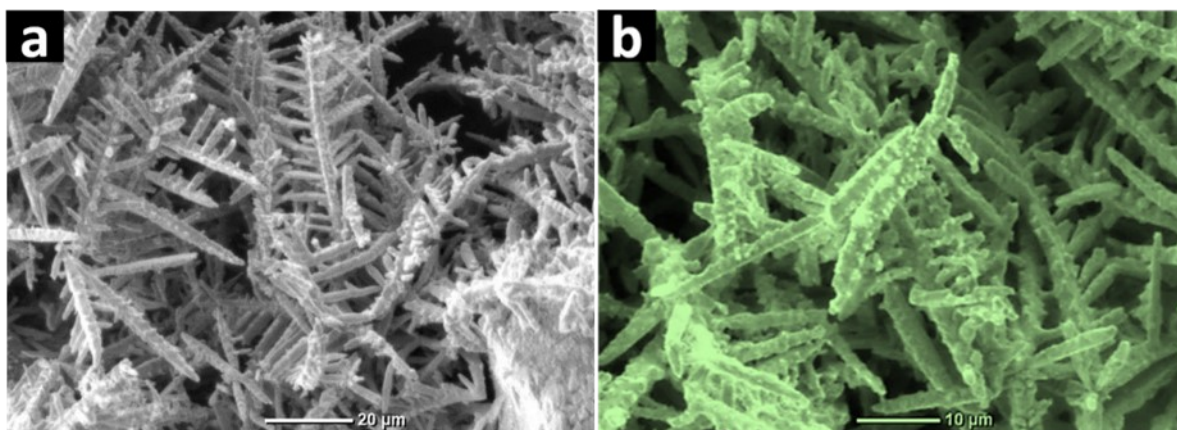

**Figure S6.** SEM images of AgSn@SnO<sub>x</sub>(30 s) (a) before, (b) after 1 hour of CO<sub>2</sub> electrolysis.

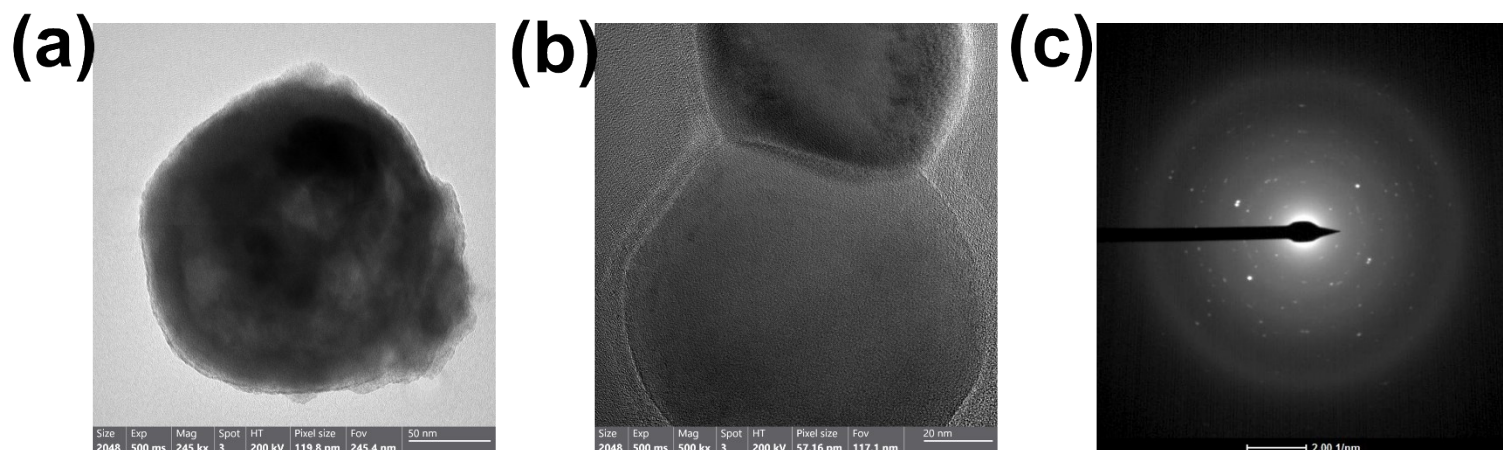

**Figure S7.** HRTEM (a) SnAg@SnO<sub>x</sub>(30 s), (b) Sn@SnO<sub>x</sub>, (c) SAED pattern of Sn@SnO<sub>x</sub>.

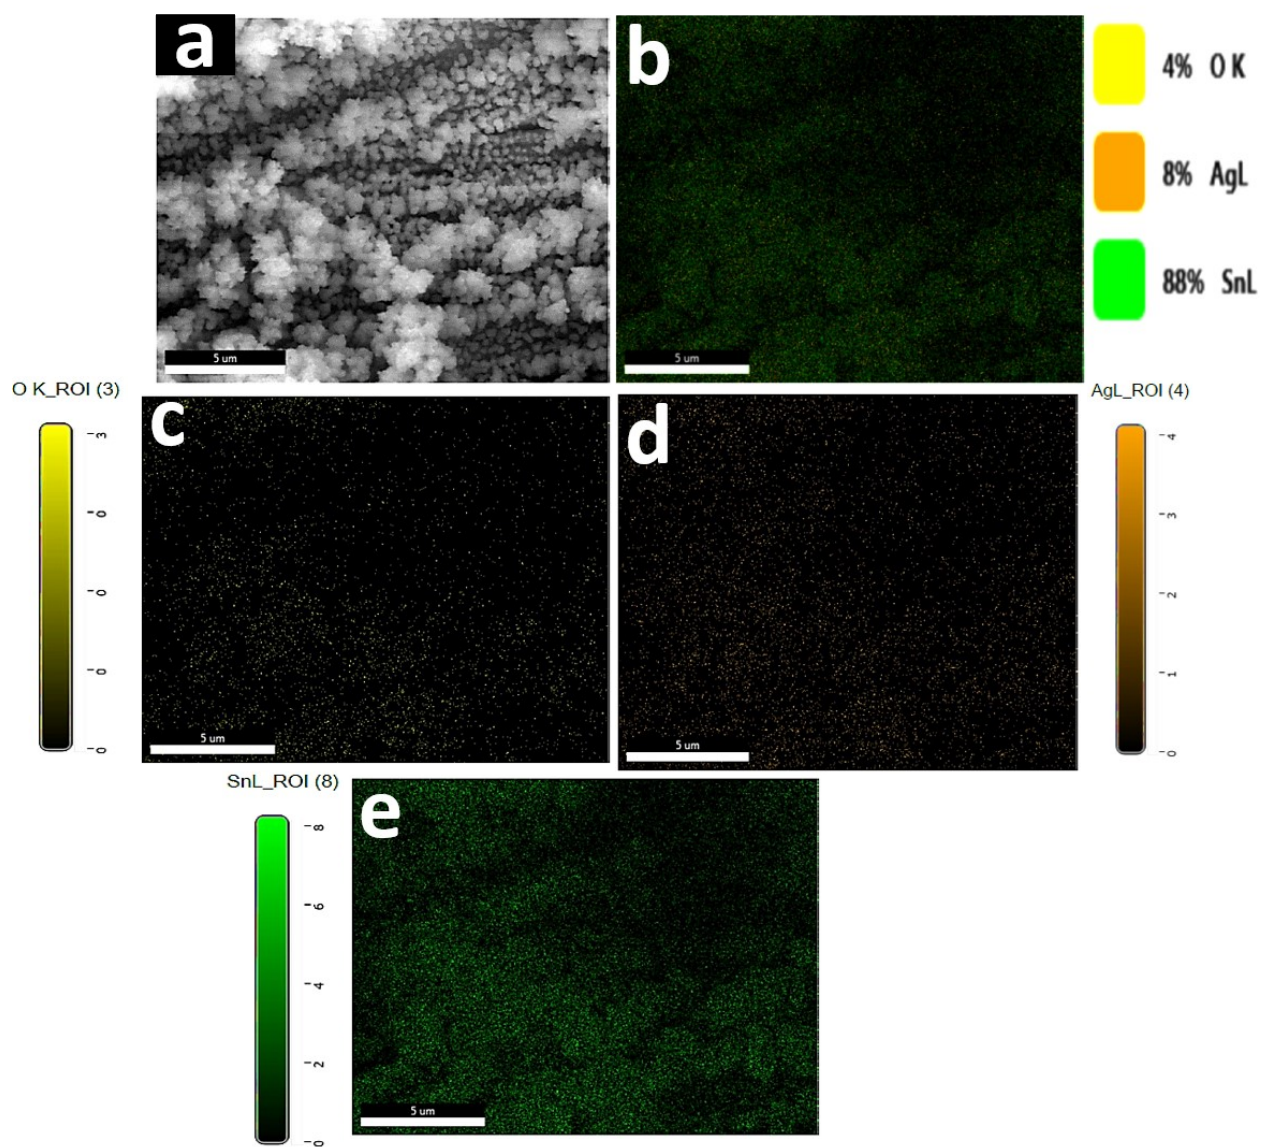

**Figure S8.** EDX mapping of AgSn@SnO<sub>x</sub>(30 s). (a) AgSn@SnO<sub>x</sub>(30 s) selected region for mapping, (b) elements distribution in the sample, (c) Oxygen, (d) Silver, (e) Tin.

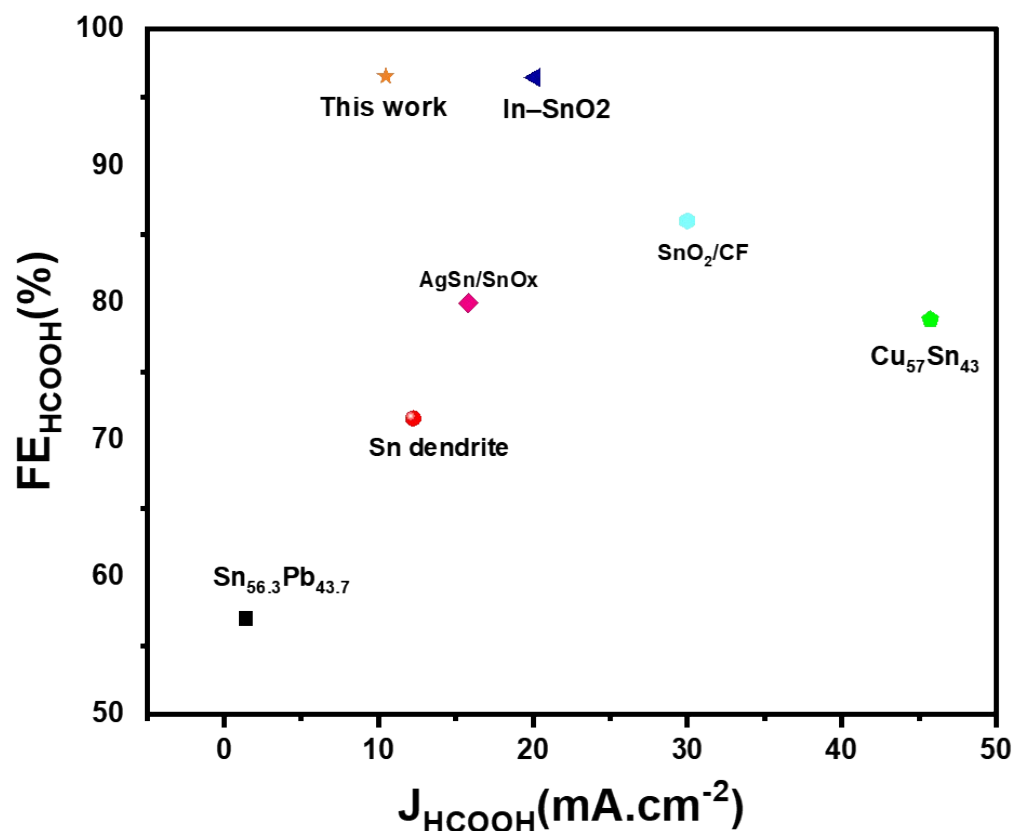

**Figure S9.** Comparison between the electrocatalytic performance of different Sn-based catalysts.

**Table S1.** Extracted data from non-faradaic cyclic voltammetry measurements for the different catalysts.

| Catalyst                       | $C_{dl}$ ( $\mu F.cm^{-2}$ ) | ECSA  | Roughness | $R^2$   |
|--------------------------------|------------------------------|-------|-----------|---------|
| Sn@SnO <sub>x</sub>            | 359.34                       | 8.98  | 7.33      | 0.99380 |
| AgSn@SnO <sub>x</sub> (15 sec) | 1000.35                      | 25    | 20.41     | 0.99944 |
| AgSn@SnO <sub>x</sub> (30 sec) | 1280.41                      | 32.01 | 26.13     | 0.99764 |
| AgSn@SnO <sub>x</sub> (45 sec) | 858.12                       | 21.45 | 17.51     | 0.99885 |

In order to determine the electrochemically active surface area (ECSA) of the electrodes, a technique involving the measurement of double-layer capacitance ( $C_{dl}$ ) was employed. This was done by taking cyclic voltammograms in a non-faradaic region with a potential range between --0.1 and -0.2 V vs. Ag/AgCl (KCl sat.), at varying scan rates of 20, 40, 60, 70, 90, and 100 mV s<sup>-1</sup>. The differences in anodic and cathodic current densities ( $\Delta j$  or  $j_a - j_c$ ) at -0.15 V were plotted against the scan rates, and a linear regression was performed on the resulting data. The slope of the line generated from the regression analysis gives the double-layer capacitance ( $C_{dl}$ ), which is proportional to the electrochemically active surface area (ECSA) of the electrodes:

$$ECSA = C_{dl}/40 \quad (2)$$

where the value of 40 is the capacitance of a flat surface. The roughness factor of the catalysts was estimated by the given equation:

$$RF = C_{dl}(catalyst)/C_{dl}(substrate) \quad (3)$$

**Table S2.** Electrocatalytic activity of different catalysts at different operating potentials.

| Applied potential (V vs. RHE)                                        | Number of experiments | Total current densities (mA.cm <sup>-2</sup> ) | FE % (H <sub>2</sub> ) | FE % (CO)          | FE % (HCOOH)       |
|----------------------------------------------------------------------|-----------------------|------------------------------------------------|------------------------|--------------------|--------------------|
| <b>Electrocatalytic performance of Sn@SnO<sub>x</sub>.</b>           |                       |                                                |                        |                    |                    |
| -0.8                                                                 | 3                     | -2.81 ± 0.15835                                | 51.0902 ± 4.23783      | 20.6848 ± 8.79514  | 31.225 ± 4.5573    |
| -0.9                                                                 | 3                     | -4.032 ± 0.43962                               | 50.52962 ± 3.4073      | 11.1233 ± 6.15895  | 40.41 ± 8.90323    |
| -1                                                                   | 3                     | -6.51 ± 0.79074                                | 21.48723 ± 3.11092     | 17.45278 ± 1.16956 | 66.24 ± 2.91855    |
| -1.1                                                                 | 3                     | -8.26 ± 0.17051                                | 25.84145 ± 3.26701     | 14.33778 ± 1.62299 | 58.375 ± 1.64402   |
| <b>Electrocatalytic performance of AgSn@SnO<sub>x</sub>(15 sec).</b> |                       |                                                |                        |                    |                    |
| -0.8                                                                 | 3                     | -3.62 ± 0.07657                                | 22.51973 ± 1.50709     | 20.3636 ± 1.331    | 57.11667 ± 1.01231 |
| -0.9                                                                 | 3                     | -4.88 ± 0.72121                                | 19.7282 ± 1.25607      | 12.2018 ± 0.98449  | 68.07 ± 1.01157    |
| -1                                                                   | 3                     | -6.28 ± 0.33689                                | 16.3163 ± 2.25199      | 9.8737 ± 0.81999   | 70.81 ± 2.51731    |
| -1.1                                                                 | 3                     | -8.15 ± 0.09731                                | 10.90813 ± 1.8502      | 4.29187 ± 0.59135  | 75.8 ± 1.628       |
| <b>Electrocatalytic performance of AgSn@SnO<sub>x</sub>(30 sec).</b> |                       |                                                |                        |                    |                    |
| -0.8                                                                 | 3                     | -6.70 ± 0.42865                                | 33.26 ± 3.60792        | 5.72 ± 3.5075      | 61 ± 3.46255       |
| -0.9                                                                 | 3                     | -10.84 ± 0.34635                               | 1.65 ± 4.87806         | 5.10 ± 3.30623     | 96.55 ± 0.67334    |
| -1                                                                   | 3                     | -13.26 ± 0.22358                               | 10.07 ± 2.02279        | 4.59 ± 1.35698     | 83.23 ± 1.83093    |
| -1.1                                                                 | 3                     | -14.90 ± 0.42412                               | 12.17 ± 4.14993        | 2.59 ± 6.35987     | 75.23 ± 0.44258    |
| <b>Electrocatalytic performance of AgSn@SnO<sub>x</sub>(45 sec).</b> |                       |                                                |                        |                    |                    |
| -0.8                                                                 | 3                     | -2.84 ± 0.38459                                | 23.42 ± 1.10912        | 2.22 ± 0.25553     | 66.08 ± 0.91871    |
| -0.9                                                                 | 3                     | -3.53 ± 0.40005                                | 30.69 ± 3.90858        | 4.20 ± 1.8893      | 63.46 ± 3.42605    |
| -1                                                                   | 3                     | -6.81 ± 0.69133                                | 18.24 ± 1.52847        | 4.66 ± 1.58795     | 79.35 ± 0.67192    |
| -1.1                                                                 | 3                     | -8.8 ± 1.10145                                 | 29.56 ± 0.89354        | 1.97 ± 0.23608     | 70.09 ± 1.11719    |

**Table S3.** Comparison the catalytic activity of AgSn@SnO<sub>x</sub> with the literature.

| Catalyst                              | Operating Potential (V vs. RHE) | Total Current Density (mA.cm <sup>-2</sup> ) | Partial Current Density (mA.cm <sup>-2</sup> ) | Faradaic Efficiency (FE <sub>HCOOH</sub> %) | Ref.      |
|---------------------------------------|---------------------------------|----------------------------------------------|------------------------------------------------|---------------------------------------------|-----------|
| AgSn@SnO <sub>x</sub> (30 sec)        | -0.9                            | 10.84                                        | 10.46                                          | 96 %                                        | This work |
| Sn <sub>56.3</sub> Pb <sub>43.7</sub> | -1.36                           | 57.3                                         | 45.73                                          | 78.8 %                                      | [1]       |
| Cu <sub>57</sub> Sn <sub>43</sub>     | -0.92                           | 2.5                                          | 1.42                                           | 57 %                                        | [2]       |
| Sn/SnO <sub>x</sub>                   | -0.7                            | 1.8                                          | 1.04                                           | 58 %                                        | [3]       |
| AgSn/SnO <sub>x</sub>                 | -0.8                            | 19.7                                         | 15.8                                           | 80 %                                        | [4]       |
| SnO <sub>2</sub> /graphene            | -1.16                           | 10.2                                         | 9.55                                           | 93.6 %                                      | [5]       |
| Sn dendrite                           | -1.36                           | 17.1                                         | 12.24                                          | 71.6 %                                      | [6]       |
| Sn-graphene                           | -1.16                           | 21.1                                         | 18.78                                          | 89 %                                        | [7]       |
| Cu@Sn                                 | -0.93                           | -                                            | 16.52                                          | 100 %                                       | [8]       |
| SnO <sub>2</sub> /CF                  | -1                              | -                                            | 30                                             | 86%                                         | [9]       |
| In-SnO <sub>2</sub>                   | -0.75                           | -                                            | 20.12                                          | 96.46%                                      | [10]      |



## References

- [1] S. Y. Choi, S. K. Jeong, H. J. Kim, I.-H. Baek, and K. T. Park, 'Electrochemical Reduction of Carbon Dioxide to Formate on Tin–Lead Alloys', *ACS Sustain Chem Eng*, vol. 4, no. 3, pp. 1311–1318, Mar. 2016, doi: 10.1021/acssuschemeng.5b01336.
- [2] M. Watanabe, M. Shibata, A. Kato, M. Azuma, and T. Sakata, 'Design of Alloy Electrocatalysts for CO<sub>2</sub> Reduction: III . The Selective and Reversible Reduction of CO<sub>2</sub> on Cu Alloy Electrodes', *J Electrochem Soc*, vol. 138, no. 11, p. 3382, Nov. 1991, doi: 10.1149/1.2085417.
- [3] Y. Chen and M. W. Kanan, 'Tin Oxide Dependence of the CO<sub>2</sub> Reduction Efficiency on Tin Electrodes and Enhanced Activity for Tin/Tin Oxide Thin-Film Catalysts', *J Am Chem Soc*, vol. 134, no. 4, pp. 1986–1989, Feb. 2012, doi: 10.1021/ja2108799.
- [4] W. Luc et al., 'Ag–sn bimetallic catalyst with a core-shell structure for CO<sub>2</sub> reduction', *J Am Chem Soc*, vol. 139, no. 5, pp. 1885–1893, Feb. 2017, doi: 10.1021/jacs.6b10435.
- [5] S. Zhang, P. Kang, and T. J. Meyer, 'Nanostructured Tin Catalysts for Selective Electrochemical Reduction of Carbon Dioxide to Formate', *J Am Chem Soc*, vol. 136, no. 5, pp. 1734–1737, Feb. 2014, doi: 10.1021/ja4113885.
- [6] D. H. Won, C. H. Choi, J. Chung, M. W. Chung, E.-H. Kim, and S. I. Woo, 'Rational Design of a Hierarchical Tin Dendrite Electrode for Efficient Electrochemical Reduction of CO<sub>2</sub>', *ChemSusChem*, vol. 8, no. 18, pp. 3092–3098, 2015, doi: <https://doi.org/10.1002/cssc.201500694>.
- [7] F. Lei et al., 'Metallic tin quantum sheets confined in graphene toward high-efficiency carbon dioxide electroreduction', *Nat Commun*, vol. 7, no. 1, p. 12697, 2016, doi: 10.1038/ncomms12697.
- [8] X. Hou et al., '3D core–shell porous-structured Cu@Sn hybrid electrodes with unprecedented selective CO<sub>2</sub>-into-formate electroreduction achieving 100%', *J. Mater. Chem. A*, vol. 7, no. 7, pp. 3197–3205, 2019, doi: 10.1039/C8TA10650A.
- [9] H. Li et al., 'Promoting the electroreduction of CO<sub>2</sub> with oxygen vacancies on a plasma-activated SnO<sub>x</sub>/carbon foam monolithic electrode', *J. Mater. Chem. A*, vol. 8, no. 4, pp. 1779–1786, 2020, doi: 10.1039/C9TA12401B.
- [10] X. Zhao et al., 'Enhanced electron transfer by In doping in SnO<sub>2</sub> for efficient CO<sub>2</sub> electroreduction to C<sub>1</sub> products', *Chem. Commun.*, vol. 58, no. 91, pp. 12716–12719, 2022, doi: 10.1039/D2CC05042K.
